# Supplementary material for: The accumulation of deficits approach to describe frailty
Source: PLoS One. 2019 Oct 15;14(10):e0223449. doi: 10.1371/journal.pone.0223449 (PMC6793873; doi:10.1371/journal.pone.0223449)
Supplement: S2 Table — (PDF) [file pone.0223449.s002.pdf]

## Supporting information

**S2 Table Prevalence of EPIC-P-FI Deficits in Women of the EPIC-Potsdam Sub-Study Population in 2010**

|                                        |                                                           | Women           |                    |                    |                  |
|----------------------------------------|-----------------------------------------------------------|-----------------|--------------------|--------------------|------------------|
| Domain                                 | Description                                               | EPIC-P-FI score |                    |                    | Total<br>N = 402 |
|                                        |                                                           | Low<br>N = 133  | Medium<br>N = 137  | High<br>N = 132    |                  |
| Health                                 | Pain (%)                                                  | 35.3            | 70.8 <sup>aa</sup> | 90.2 <sup>aa</sup> | 65.4             |
|                                        | State of health (%)                                       |                 |                    |                    |                  |
|                                        | 0.5 (less well)                                           | 2.3             | 9.5 <sup>a</sup>   | 52.3 <sup>aa</sup> | 21.1             |
|                                        | 1 (bad)                                                   | 0               | 0                  | 3.0                | 1.0              |
|                                        | More than 5 drugs (%)                                     | 3.0             | 13.9 <sup>aa</sup> | 40.2 <sup>aa</sup> | 18.9             |
|                                        | Tumor (%)                                                 | 4.5             | 11.9 <sup>a</sup>  | 14.6 <sup>aa</sup> | 10.4             |
|                                        | Missing subjects (N)                                      | 1               | 3                  | 2                  | 6                |
|                                        | Diabetes (%)                                              | 1.5             | 4.4                | 7.8 <sup>a</sup>   | 4.5              |
|                                        | Missing subjects (N)                                      | 0               | 2                  | 4                  | 6                |
|                                        | Myocardial infarction (%) <sup>b</sup>                    | 0               | 0                  | 3.0                | 1.0              |
|                                        | Stroke (%) <sup>b</sup>                                   | 0               | 1.5                | 2.3                | 1.2              |
|                                        | Tia (%) <sup>b</sup>                                      | 2.3             | 3.6                | 9.1 <sup>a</sup>   | 5.0              |
|                                        | Heart failure (%) <sup>b</sup>                            | 0               | 1.5                | 0                  | 0.5              |
|                                        | Missing subjects (N)                                      | 0               | 0                  | 1                  | 1                |
|                                        | Angina pectoris (%) <sup>b</sup>                          | 1.5             | 2.3                | 6.5                | 3.3              |
|                                        | Missing subjects (N)                                      | 1               | 4                  | 8                  | 13               |
|                                        | Hypertension (%)                                          | 27.6            | 45.9 <sup>aa</sup> | 70.5 <sup>aa</sup> | 47.7             |
|                                        | Missing subjects (N)                                      | 6               | 2                  | 10                 | 18               |
|                                        | Osteoporosis (%)                                          | 3.1             | 6.3                | 8.3                | 5.8              |
|                                        | Missing subjects (N)                                      | 4               | 9                  | 12                 | 25               |
| Psychosoci<br>al<br>Aspects            | Managed less than wanted because of mental problems (%)   | 3.0             | 15.3 <sup>aa</sup> | 49.2 <sup>aa</sup> | 22.4             |
|                                        | Working carefully as usual not possible (%)               | 2.3             | 8.8 <sup>a</sup>   | 43.9 <sup>aa</sup> | 18.2             |
|                                        | Satisfied with health (%)                                 |                 |                    |                    |                  |
|                                        | 0.5 (rather dissatisfied)                                 | 0               | 9.5 <sup>aa</sup>  | 45.5 <sup>aa</sup> | 18.2             |
|                                        | 1 (very dissatisfied)                                     | 0               | 0                  | 5.3                | 1.7              |
|                                        | Satisfied with life (%)                                   |                 |                    |                    |                  |
|                                        | 0.5 (rather dissatisfied)                                 | 0               | 5.1 <sup>aa</sup>  | 17.4 <sup>aa</sup> | 7.5              |
|                                        | 1 (very dissatisfied)                                     | 0               | 0                  | 3.8                | 1.2              |
|                                        | Dispirited and sad (%) <sup>b</sup>                       |                 |                    |                    |                  |
|                                        | 0.5 (sometimes, quite often)                              | 3.0             | 4.4                | 18.2 <sup>aa</sup> | 8.5              |
|                                        | 1 (mostly, always)                                        | 0               | 2.9                | 6.1                | 3.0              |
|                                        | Have still many plans (%)                                 |                 |                    |                    |                  |
|                                        | 0.5 (partially applies)                                   | 38.2            | 43.0               | 46.1 <sup>aa</sup> | 42.4             |
|                                        | 1 (does not apply)                                        | 3.1             | 6.7                | 16.4               | 8.6              |
|                                        | Missing subjects (N)                                      | 2               | 2                  | 4                  | 8                |
|                                        | Affected contacts to other persons (%)                    |                 |                    |                    |                  |
|                                        | 0.5 (sometimes)                                           | 3.8             | 10.9 <sup>a</sup>  | 29.5 <sup>aa</sup> | 14.7             |
|                                        | 1 (always, mostly)                                        | 0               | 0                  | 13.6               | 4.5              |
| Physical<br>Ability                    | Managed less than wanted because of physical problems (%) | 3.8             | 27.7 <sup>aa</sup> | 77.3 <sup>aa</sup> | 36.1             |
|                                        | Only done specific things (%)                             | 0.8             | 17.5 <sup>aa</sup> | 71.2 <sup>aa</sup> | 29.6             |
|                                        | Hand grip strength (%) <sup>b</sup>                       | 1.6             | 5.0                | 15.1 <sup>aa</sup> | 6.8              |
|                                        | Missing subjects (N)                                      | 8               | 17                 | 26                 | 51               |
|                                        | Physical activity level (%)                               | 6.3             | 19.8 <sup>aa</sup> | 31.5 <sup>aa</sup> | 19.1             |
|                                        | Missing subjects (N)                                      | 22              | 21                 | 24                 | 67               |
| Limited in medium heavy activities (%) |                                                           |                 |                    |                    |                  |

|                    |                                       |                                |      |                    |                    |      |
|--------------------|---------------------------------------|--------------------------------|------|--------------------|--------------------|------|
|                    |                                       | <b>0.5 (minor limitations)</b> | 6.0  | 41.6 <sup>aa</sup> | 61.4 <sup>aa</sup> | 36.3 |
|                    |                                       | <b>1 (major limitations)</b>   | 0    | 0.7                | 15.9               | 5.5  |
|                    | <b>Limited because of pain (%)</b>    |                                |      |                    |                    |      |
|                    |                                       | <b>0.5 (minor limitations)</b> | 26.3 | 70.1 <sup>aa</sup> | 70.5 <sup>aa</sup> | 55.7 |
|                    |                                       | <b>1 (major limitations)</b>   | 1.5  | 2.9                | 24.2               | 9.5  |
|                    | <b>Limited in climbing stairs (%)</b> |                                |      |                    |                    |      |
|                    |                                       | <b>0.5 (minor limitations)</b> | 7.5  | 46.0 <sup>aa</sup> | 66.7 <sup>aa</sup> | 40.0 |
|                    |                                       | <b>1 (major limitations)</b>   | 0    | 2.2                | 15.9               | 6.0  |
|                    | <b>Full of energy (%)<sup>b</sup></b> |                                |      |                    |                    |      |
|                    |                                       | <b>0.5 (rarely)</b>            | 1.5  | 2.9                | 24.3 <sup>aa</sup> | 9.5  |
|                    |                                       | <b>1 (never)</b>               | 0    | 0.7                | 6.1                | 2.2  |
| <b>Physiologic</b> | <b>Body fat percentage (%)</b>        |                                | 5.3  | 21.9 <sup>aa</sup> | 32.1 <sup>aa</sup> | 19.7 |
| <b>al</b>          |                                       |                                |      |                    |                    |      |
| <b>Aspects</b>     | <b>Unwanted weight loss (%)</b>       |                                | 4.8  | 7.4                | 4.5                | 5.6  |
|                    | <b>Missing subjects (N)</b>           |                                | 8    | 16                 | 22                 | 46   |
|                    | <b>BMI (%)</b>                        |                                | 0.8  | 23.4 <sup>aa</sup> | 50.0 <sup>aa</sup> | 24.6 |
|                    | <b>Whrt (%)</b>                       |                                | 2.3  | 31.4 <sup>aa</sup> | 53.8 <sup>aa</sup> | 29.1 |
|                    | <b>Malnutrition (%)</b>               |                                | 15.0 | 31.4 <sup>aa</sup> | 45.5 <sup>aa</sup> | 30.6 |

<sup>a</sup> *P*-value < 0.05 compared to low EPIC-P-FI; <sup>aa</sup>*P*-value < 0.01 compared to low EPIC-P-FI; <sup>b</sup>Differences between EPIC-P-FI groups were calculated with Fisher's exact test.
